# Supplementary material for: Modulating the magnetic behavior of Fe(ii)–MOF-74 by the high electron affinity of the guest molecule
Source: Royal Society of Chemistry journal article supplement (doi:10.1039/c5cp01441g), 2015-01-01
Supplement: c5cp01441g1.pdf [file c5cp01441g1.pdf]

**Supporting Information**

Modulating magnetic behavior of Fe-MOF-74 by  
high electron affinity of the guest molecule

*Sungmin Han,<sup>†</sup> Heejin Kim,<sup>†,‡</sup> Jaehoon Kim,<sup>†</sup> Yousung Jung<sup>†,\*</sup>*

<sup>†</sup>Graduate School of Energy, Environment, Water and Sustainability (EEWS), Korea Advanced Institute of Science and Technology, Daejeon, 305-701, Republic of Korea

<sup>‡</sup>Analysis Research Division, Suncheon Center, Korea Basic Science Institute, Suncheon 540-742, Republic of Korea

## The orbital overlap in the intrachain superexchange in Figure 4

On the basis of PROCAR data from VASP, where it includes the spd- and site projected wave function character in each of energy bands, we estimate the degrees of orbital overlaps between the target d orbitals (Fe1- $d_{x^2-y^2}$  and  $d_{z^2}$ , Fe2- $d_{yz}$ , and Fe3- $d_{x^2-y^2}$ ) and  $p_\sigma$  orbitals of O<sup>br</sup>. In this analysis, we approximate that if one of the target d orbitals is mixed with one of the  $p_\sigma$  orbitals of O<sup>br</sup>, both of those orbitals have higher atomic orbital (AO) coefficients at the same energy band. That is, by multiplying the AO coefficients for the target d orbitals of Fe by the AO coefficients for the  $p_\sigma$  orbitals of O<sup>br</sup> in all energy bands, we estimate the relative degree of orbital overlaps of  $p_\sigma$  orbitals with Fe2- $d_{yz}$  vs. Fe1- or Fe3- $e_g$ . From Table SI 1, it is clearly seen that these  $p_\sigma$  orbitals overlapping with the  $e_g$  orbitals ( $d_{x^2-y^2}$  and  $d_{z^2}$ ) of Fe1 and Fe3 are much more pronounced than the overlapping with the  $d_{yz}$  orbital of Fe2, due to the  $\sigma$  bonding directions, supporting our interpretations based on the GKA rules. We note that the reason for the non-zero overlap values in Table S1 for Fe2- $d_{yz}$  (despite the geometric near-orthogonality) is due to the limitation of the present approximate analysis which does not include the phase information, however, it does provide the relative degree of orbital overlaps between the  $p_\sigma$  orbitals of O<sup>br</sup> and Fe2- $d_{yz}$  vs. Fe1- or Fe3- $e_g$ .

| $\text{O}^{\text{br}}\text{-p}_\sigma$ |                          |
|----------------------------------------|--------------------------|
| $\text{Fe2-d}_{yz}$                    | $\text{Fe1- or Fe3-e}_g$ |
| 0.18                                   | 0.44                     |

**Table SI 1.** Approximate relative degrees of orbital overlaps of  $\text{O}^{\text{br}}\text{-p}_\sigma$  with  $\text{Fe2-d}_{yz}$  vs.  $\text{Fe1-}$  or  $\text{Fe3-e}_g$ . Values in this table are an averaged value for all the  $\text{p}_\sigma$  orbitals of  $\text{O}^{\text{br}}$  in Figure 4.
